# Supplementary material
Source: Springer Nature journal article supplement (https://www.springermedizin.de/resource/supplementary/12902_2013_219_MOESM3_ESM.pdf/9515930)

**A**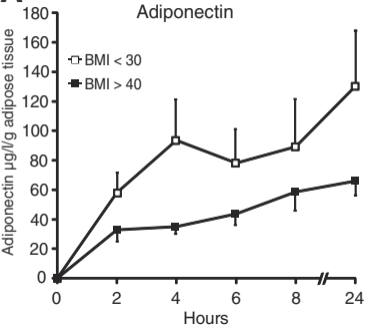**B**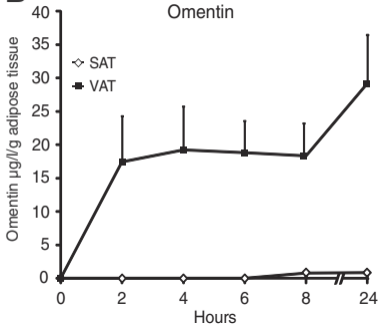

Supplement: MOESM3 [file 9515930]
